# Supplementary material for: Reversible switching on superhydrophobic TiO2nano-strawberry films fabricated at low temperature
Source: Royal Society of Chemistry journal article supplement (doi:10.1039/b715805j), 2007-11-26
Supplement: b715805j.pdf [file b715805j.pdf]

## Superhydrophobic TiO<sub>2</sub> Nano-strawberry Films Fabricated at Low Temperature and the Reversible Switch

Wentao Sun<sup>a</sup>, Shuyun Zhou<sup>b</sup>, Ping Chen<sup>\*b</sup> and Lianmao Peng<sup>a</sup>

\*Correspondence to Ping Chen, [chenlab@mail.ipc.ac.cn](mailto:chenlab@mail.ipc.ac.cn)

*a Key Laboratory for the Physics and Chemistry of Nanodevices and Department of Electronics, Peking University, Beijing 100871, P.R. China.*

*b Technical Institute of Physics and Chemistry, Chinese Academy of Sciences, Beijing 100080, P. R. China.*

### Supporting Information

**The advanced/receding contact angle (CA), contact angle hysteresis, and sliding angle of the superhydrophobic TiO<sub>2</sub> film.**

|                      |        |
|----------------------|--------|
| <b>Advanced CA</b>   | 169.7° |
| <b>Receding CA</b>   | 158.4° |
| <b>CA hysteresis</b> | 11.3°  |
| <b>Sliding angle</b> | 13°    |
